# Supplementary material for: Moringa oleifera coagulation as pretreatment prior to microfiltration for membrane fouling mitigation
Source: Royal Society of Chemistry journal article supplement (doi:10.1039/c8ew00186c), 2018-01-01
Supplement: c8ew00186c1.pdf [file c8ew00186c1.pdf]

***Moringa oleifera* coagulation as pretreatment prior to microfiltration for  
membrane fouling mitigation**

Ronald Katalo <sup>1</sup>, Tetsuji Okuda <sup>2</sup>, Long D. Nghiem <sup>3</sup>, Takahiro Fujioka <sup>1,\*</sup>

<sup>1</sup> *Department of Advanced Engineering, Graduate School of Engineering,  
Nagasaki University, 1-14 Bunkyo-machi, Nagasaki 852-8521, Japan*

<sup>2</sup> *Faculty of Science & Technology, Ryukoku University,  
1-5 Yokotani, Seta Oe-cho, Otsu, Shiga 520-2194, Japan*

<sup>3</sup> *Centre for Technology in Water and Wastewater, University of Technology Sydney,  
Ultimo, NSW 2007, Australia*

**Supporting Information**

---

\* Corresponding author: Takahiro Fujioka, Email: tfujioka@nagasaki-u.ac.jp, Ph +81 095 819 2695

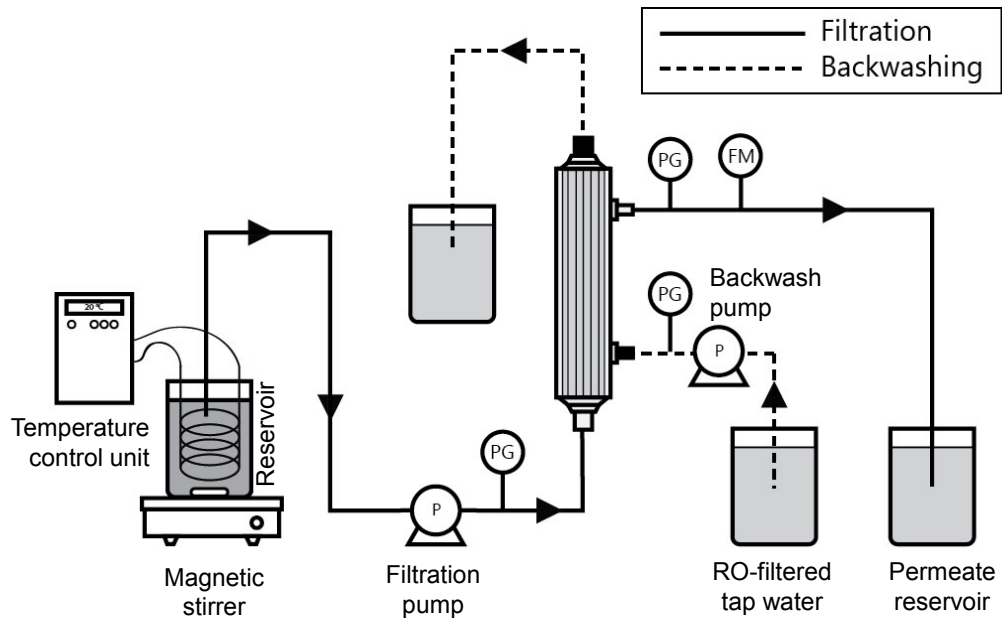

**Fig. 1** – Schematic diagram of the MF system.

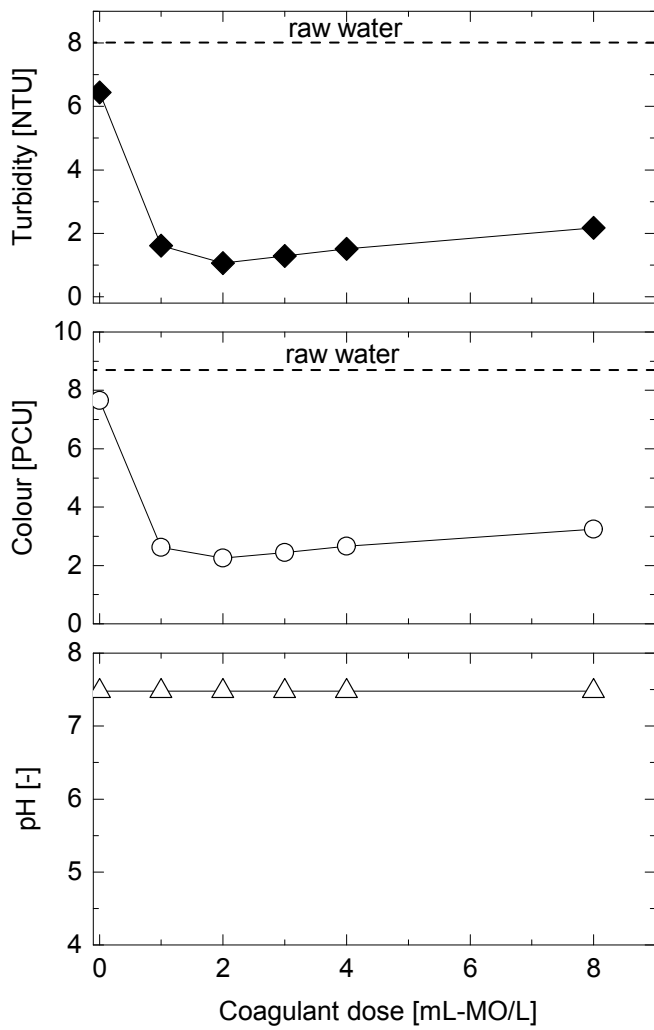

**Fig. S2** – Removal of turbidity and color and change in pH in the surface water at various MO coagulant doses (initial turbidity = 8.0 NTU and initial colour = 8.7 PCU).

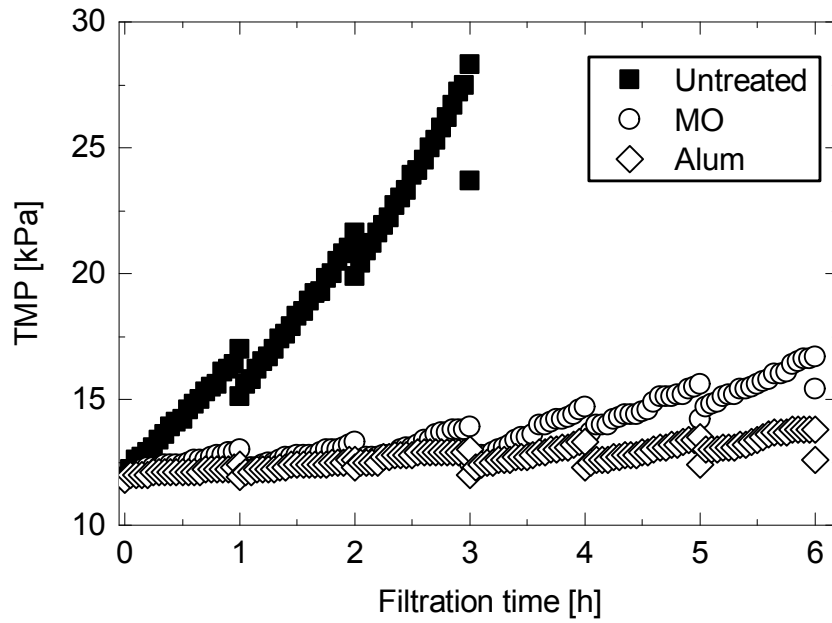

**Fig. S3** – Comparison of fouling development in MF treatment without pretreatment, with MO coagulation at 2 mL-MO/L or with alum coagulation at 4 mg-Al/L for the second batch of filtration experiments (permeate flux = 140 L/m<sup>2</sup>h, backwashing flux = 280 L/m<sup>2</sup>h and backwashing time = 1 min).

**Table S1** – Water quality before and after coagulation at their optimum doses (2 mL-MO/L and 4 mg-Al/L) for water samples used for zeta potential and particle size analysis.

| Parameter       | Untreated river water | MO treated river water | Alum treated river water |
|-----------------|-----------------------|------------------------|--------------------------|
| Turbidity (NTU) | 7.9                   | 1.0                    | 0.1                      |
| Colour (PCU)    | 8.5                   | 2.5                    | 0.8                      |
| pH              | 7.1                   | 7.1                    | 6.0                      |
